# Supplementary material for: Ontogeny of the middle ear and auditory sensitivity in the Natterjack toad (Epidalea calamita)
Source: Oxford University Press journal article supplement (doi:10.1242/jeb.244759), 2022-10-21
Supplement: jeb244759supp.pdf [file jeb244759supp.pdf]

**Table S1.** Overview of experimental animals. Each group contains animals that were subject to experiments at the same age. Metamorph.: end of metamorphosis. d.p.m.: days post metamorphosis. Head: width of the head measured at the eardrums. Vib. d/v: vibration stimulation in a dorsal/ventral direction (test animal in a natural upright position). Vib. L.: vibration stimulation in a lateral direction (test animal placed on the side). X's indicate that the animal in that specific row had been subject to the method indicated by the column. Empty rows indicate NAs. **Orange** rows contains animals from 2014, **blue** rows animals from 2016, **green** rows animals from 2017 and **grey** rows wild-caught animals. "X" indicates that the animal has been subject to the experimental method. "V" ( $\mu$ CT) indicates that the animal was scanned, but that the scan was incomplete, and re-scans were not possible, because the animal had been stained or dissected in the meantime. Individuals EC17d and EC17e were removed from the data-analysis as they did not wake up from anaesthesia.

| ID    | age   | SVL   | Metamorph.          | Mass            | Head           | Age           | SVL           | Auditory brainstem response |              |              | Laser | $\mu$ CT | Dissection | Stain |
|-------|-------|-------|---------------------|-----------------|----------------|---------------|---------------|-----------------------------|--------------|--------------|-------|----------|------------|-------|
|       | group | group | d.m.y               | [g]             | [mm]           | [d.p.m.]      | [mm]          | Sound                       | Vib. d/v     | Vib. L       |       |          |            |       |
| EC14a | B     | B     | 25.05.14            |                 | 6.0            | 31            | 18            | X                           |              |              | X     | X        |            |       |
| EC14b | B     | B     | 25.05.14            |                 | 5.5            | 31            | 16            | X                           |              |              | X     |          | X          |       |
| EC14c | B     | B     | 25.05.14            |                 | 5.5            | 33            | 15.5          | X                           |              |              | X     |          | X          |       |
| EC14d | D     | C     | 25.05.14            |                 | 9.0            | 109           | 22            | X                           | X            |              |       |          |            |       |
| EC14e | D     | C     | 25.05.14            |                 | 9.0            | 110           | 23            | X                           | X            |              | X     | X        |            |       |
| EC14f | D     | C     | 25.05.14            |                 | 9.0            | 115           | 24            | X                           | X            |              | X     |          | X          |       |
| EC14g | E     | D     | 25.05.14            |                 | 8.5            | 284           | 26            | X                           | X            |              | X     |          |            |       |
| EC14h | E     | D     | 25.05.14            |                 | 9.5            | 284           | 27            | X                           | X            |              | X     |          | X          |       |
| EC14i | E     | D     | 25.05.14            |                 | 10.0           | 289           | 26            | X                           | X            |              | X     |          | X          |       |
| EC14j | F     | D     | 25.05.14            |                 | 9.0            | 332           | 26            | X                           | X            |              | V     |          | X          |       |
| EC14k | F     | D     | 25.05.14            |                 | 9.5            | 334           | 26            | X                           | X            |              |       |          |            |       |
| EC14l | F     | D     | 25.05.14            |                 | 9.5            | 335           | 25.5          | X                           | X            |              | X     |          | X          |       |
| EC14m | F     | E     | 25.05.14            |                 | 13.0           | 370           | 33            | X                           | X            |              | V     | X        |            |       |
| EC14n | F     | E     | 25.05.14            |                 | 10.5           | 370           | 30            | X                           | X            |              | V     | X        |            |       |
| EC14o | F     | D     | 25.05.14            |                 | 11.0           | 370           | 29            | X                           | X            |              |       |          | X          |       |
| EC14p | H     | G     | 25.05.14            | 43.91           | 24.0           | 885           | 62            | X                           | X            |              | X     | X        | X          |       |
| EC14q | H     | H     | 25.05.14            | 33.27           | 22.0           | 886           | 65            | X                           | X            |              | X     |          |            |       |
| EC14r | H     | H     | 25.05.14            | 36.58           | 22.0           | 887           | 68            | X                           | X            |              | X     | X        | X          |       |
| EC16a | D     | E     | 25.06.16            | 6.94            | 14.0           | 133           | 39            | X                           | X            | X            | X     | X        | X          |       |
| EC16b | D     | D     | 25.06.16            | 6.47            | 14.0           | 131           | 29            | X                           | X            | X            | X     | X        |            |       |
| EC16c | D     | C     | 25.06.16            | 1.08            | 8.0            | 132           | 23            | X                           | X            | X            | X     | X        | X          |       |
| EC16d | D     | B     | 25.06.16            | 0.49            | 7.0            | 133           | 18            | X                           | X            | X            | X     |          | X          |       |
| EC16e | G     | D     | 25.06.16            | 2.01            | 10.0           | 451           | 27            | X                           | X            | X            | X     |          |            |       |
| EC16f | G     | D     | 25.06.16            | 2.22            | 10.5           | 452           | 28            | X                           | X            | X            | X     | X        | X          |       |
| EC16g | G     | D     | 25.06.16            | 1.77            | 10.0           | 453           | 27            | X                           | X            | X            |       |          |            |       |
| EC16h | G     | F     | 25.06.16            | 19.91           | 17.0           | 458           | 55            | X                           | X            | X            | X     | X        |            |       |
| EC16i | G     | G     | 25.06.16            | 28.20           | 22.0           | 458           | 63            | X                           | X            | X            | X     | X        | X          |       |
| EC16j | G     | G     | 25.06.16            |                 | 22.0           | 458           | 64            | X                           | X            | X            | X     |          |            |       |
| EC16k | H     | H     | 25.06.16            |                 | 24.0           | 832           | 66            | X                           | X            |              | X     |          |            |       |
| EC16l | H     | H     | 25.06.16            |                 | 24.0           | 832           | 67            | X                           | X            |              | X     | X        |            |       |
| EC16m | H     | G     | 25.06.16            |                 | 23.0           | 832           | 64            | X                           | X            |              | X     | V        | X          |       |
| EC17a | A     | A     | 20.06.17            | 0.14            | 4.0            | 4             | 11            | X                           | X            | X            | X     |          | X          |       |
| EC17b | A     | A     | 20.06.17            | 0.22            | 4.5            | 7             | 13            | X                           | X            | X            | X     |          | X          |       |
| EC17c | A     | A     | 20.06.17            | 0.12            | 4.0            | 7             | 10            | X                           | X            | X            |       |          |            |       |
| EC17d |       |       | <del>20.06.17</del> | <del>0.06</del> | <del>3.5</del> | <del>14</del> | <del>8</del>  | <del>X</del>                | <del>X</del> | <del>X</del> | -     | V        | -          |       |
| EC17e |       |       | <del>20.06.17</del> | <del>0.10</del> | <del>3.5</del> | <del>14</del> | <del>10</del> | <del>X</del>                | <del>X</del> | <del>X</del> | -     | -        | -          |       |
| EC17f | C     | A     | 20.06.17            | 0.23            | 4.5            | 84            | 13            | X                           | X            | X            | X     |          |            |       |
| EC17g | C     | A     | 20.06.17            | 0.24            | 5.0            | 84            | 13            | X                           | X            | X            |       | X        | X          |       |
| EC17h | C     | A     | 20.06.17            | 0.25            | 4.5            | 91            | 11.5          | X                           | X            | X            | X     | X        |            |       |
| EC17i | C     | A     | 20.06.17            | 0.33            | 5.0            | 91            | 14            | X                           | X            | X            |       |          |            |       |
| EC17j | C     | A     | 20.06.17            | 0.35            | 5.0            | 91            | 14            | X                           | X            | X            |       |          | X          |       |
| ECWa  | H     | F     | wild-caught         | 18.5            | 21.0           | 1000          | 57            | X                           | X            |              |       |          |            |       |
| ECWb  | H     | G     | wild-caught         | 30.9            | 22.0           | 1000          | 62            | X                           | X            |              |       |          |            |       |
| ECWc  | H     | G     | wild-caught         | 23.1            | 19.0           | 1000          | 60            | X                           | X            |              |       |          |            |       |
| ECWd  | H     | G     | wild-caught         | 20.0            | 19.0           | 1000          | 63            | X                           | X            |              |       |          |            |       |

**Table S2.** Morphological results of differential stains for bone (red) and cartilage (blue) and  $\mu$ CT scans (showing ossified structures).

| Animal | SVL (mm) | Age (d.p.m.) | Differential stain                                                                                                         | $\mu$ CT                           |
|--------|----------|--------------|----------------------------------------------------------------------------------------------------------------------------|------------------------------------|
| EC14c  | 15.5     | 33           | No structures                                                                                                              | No structures                      |
| EC14e  | 23       | 110          | -                                                                                                                          | No structures                      |
| EC14f  | 24       | 115          | -                                                                                                                          | No structures                      |
| EC14g  | 26       | 284          | -                                                                                                                          | Small distal shaft                 |
| EC14i  | 26       | 289          | Aggregation of blue cells at the site of the tympanic membrane/extra-columella                                             | Small distal shaft                 |
| EC14L  | 25.5     | 335          | Aggregation of blue cells at the site of the tympanic membrane/extra-columella, very thin ossification of columella shaft. | Small distal shaft                 |
| EC14 o | 29       | 370          | Small ossified columella shaft                                                                                             | Small columella                    |
| EC14p  | 62       | 885          | -                                                                                                                          | Fully ossified shaft and footplate |
| EC14r  | 68       | 887          | -                                                                                                                          | Fully ossified shaft and footplate |
| EC16a  | 39       | 133          | -                                                                                                                          | Small distal shaft                 |
| EC16b  | 29       | 131          | -                                                                                                                          | Small distal shaft                 |
| EC16c  | 23       | 132          | Small ossified columella shaft                                                                                             | Ossified shaft                     |
| EC16d  | 18       | 133          | Small part in the middle of the columella has ossified, blue aggregation at the eardrum                                    | No structures                      |
| EC16f  | 28       | 452          | Blue eardrum/annulus<br>Blue extra-columella connecting shaft (ossified) and eardrum<br>Visible operculum                  | Ossified shaft                     |
| EC16h  | 55       | 458          |                                                                                                                            | Fully ossified shaft               |
| EC16i  | 63       | 458          | Fully ossified footplate and shaft, chondrified extra-columella and tympanic annulus.                                      | Full shaft and footplate           |
| EC16L  | 67       | 832          | -                                                                                                                          | Full shaft and footplate           |
| EC17a  | 11       | 4            | -                                                                                                                          | No structures                      |
| EC17e  | 10       | 14           | No structures                                                                                                              | No structures                      |
| EC17g  | 13       | 84           | Aggregation of blue cells at the site of the tympanic membrane/extra-columella                                             | No structures                      |
| EC17h  | 11.5     | 91           | -                                                                                                                          | No structures                      |
| EC17j  | 14       | 91           | Aggregation of blue cells at the site of the tympanic membrane/extra-columella                                             | No structures                      |

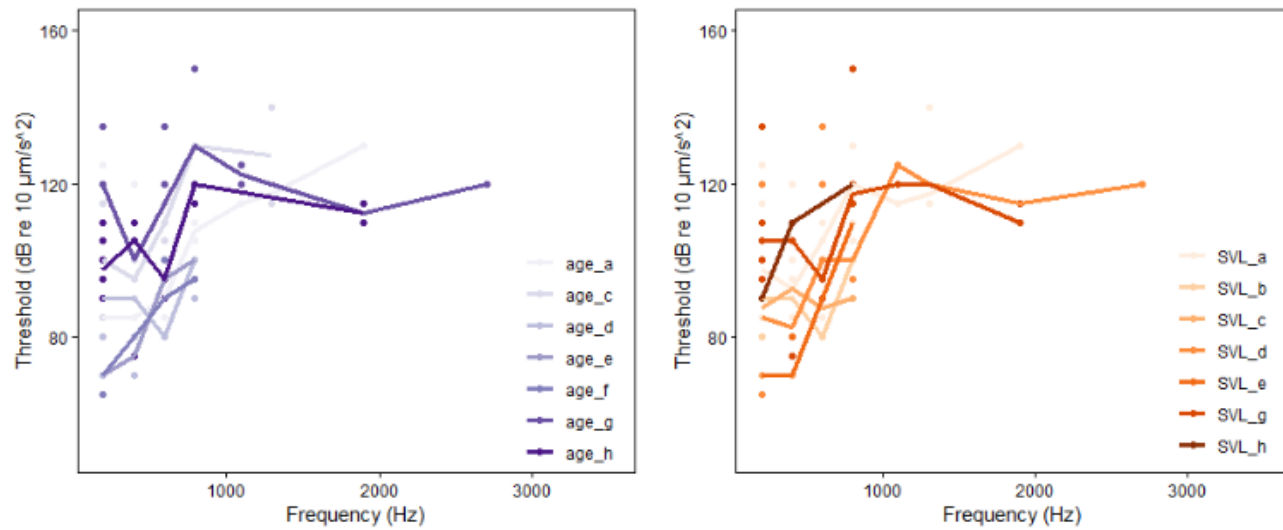

**Fig. S1.** Auditory brainstem responses to dorso/ventral vibration stimulation for each age (left) and size (right) group. Lines are medians of each group respectively. Lighter colours indicate younger and smaller animals, darker colours indicate older and bigger animals.

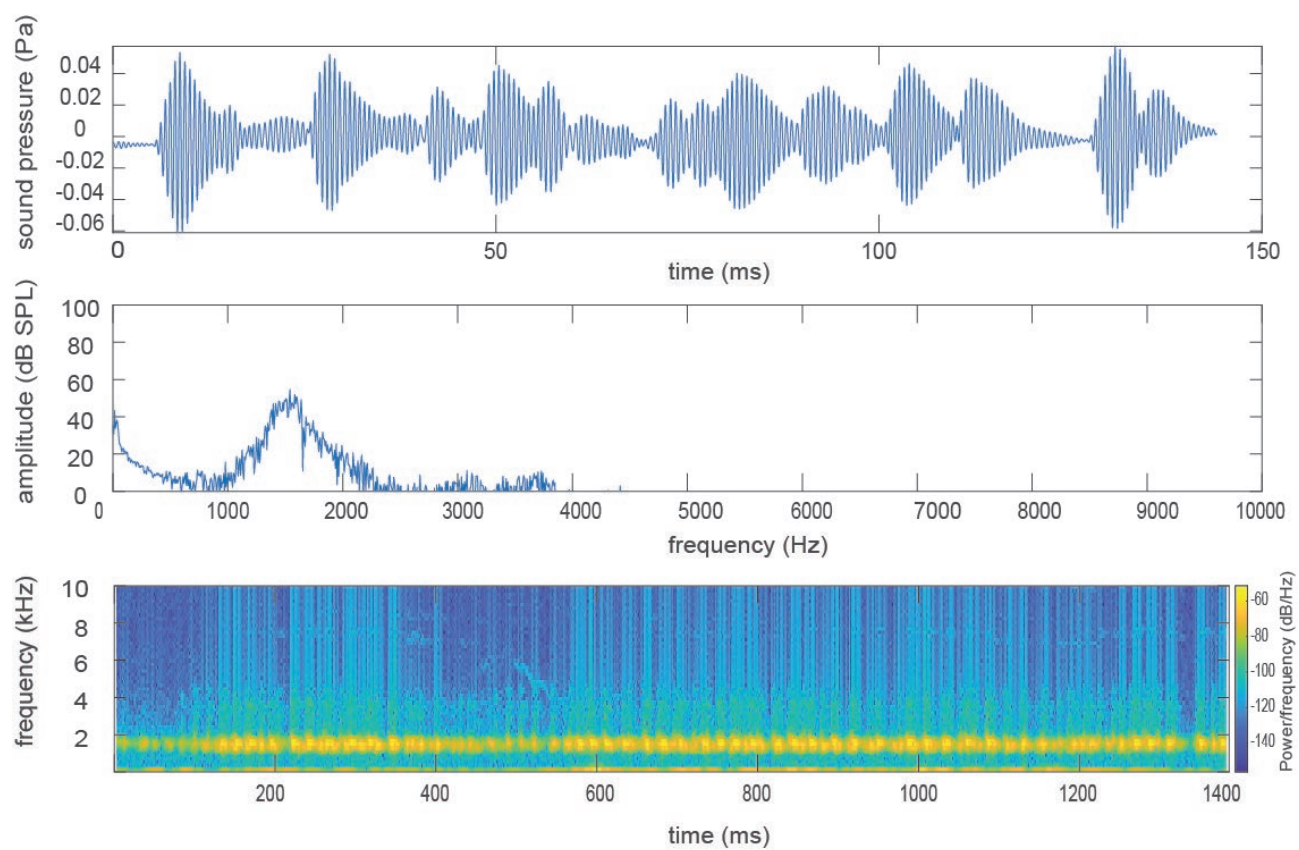

**Fig. S2.** Oscillogram, frequency spectrum and spectrogram of a field recording (JCD) of a calling natterjack toad. Spectrogram settings: FFT size: 512, overlap 500/512 98%, 512 points Hamming window. From this recording the source level of a single male calling was calculated to be 82 dB re. 20  $\mu$ Pa at a distance of 1 m.

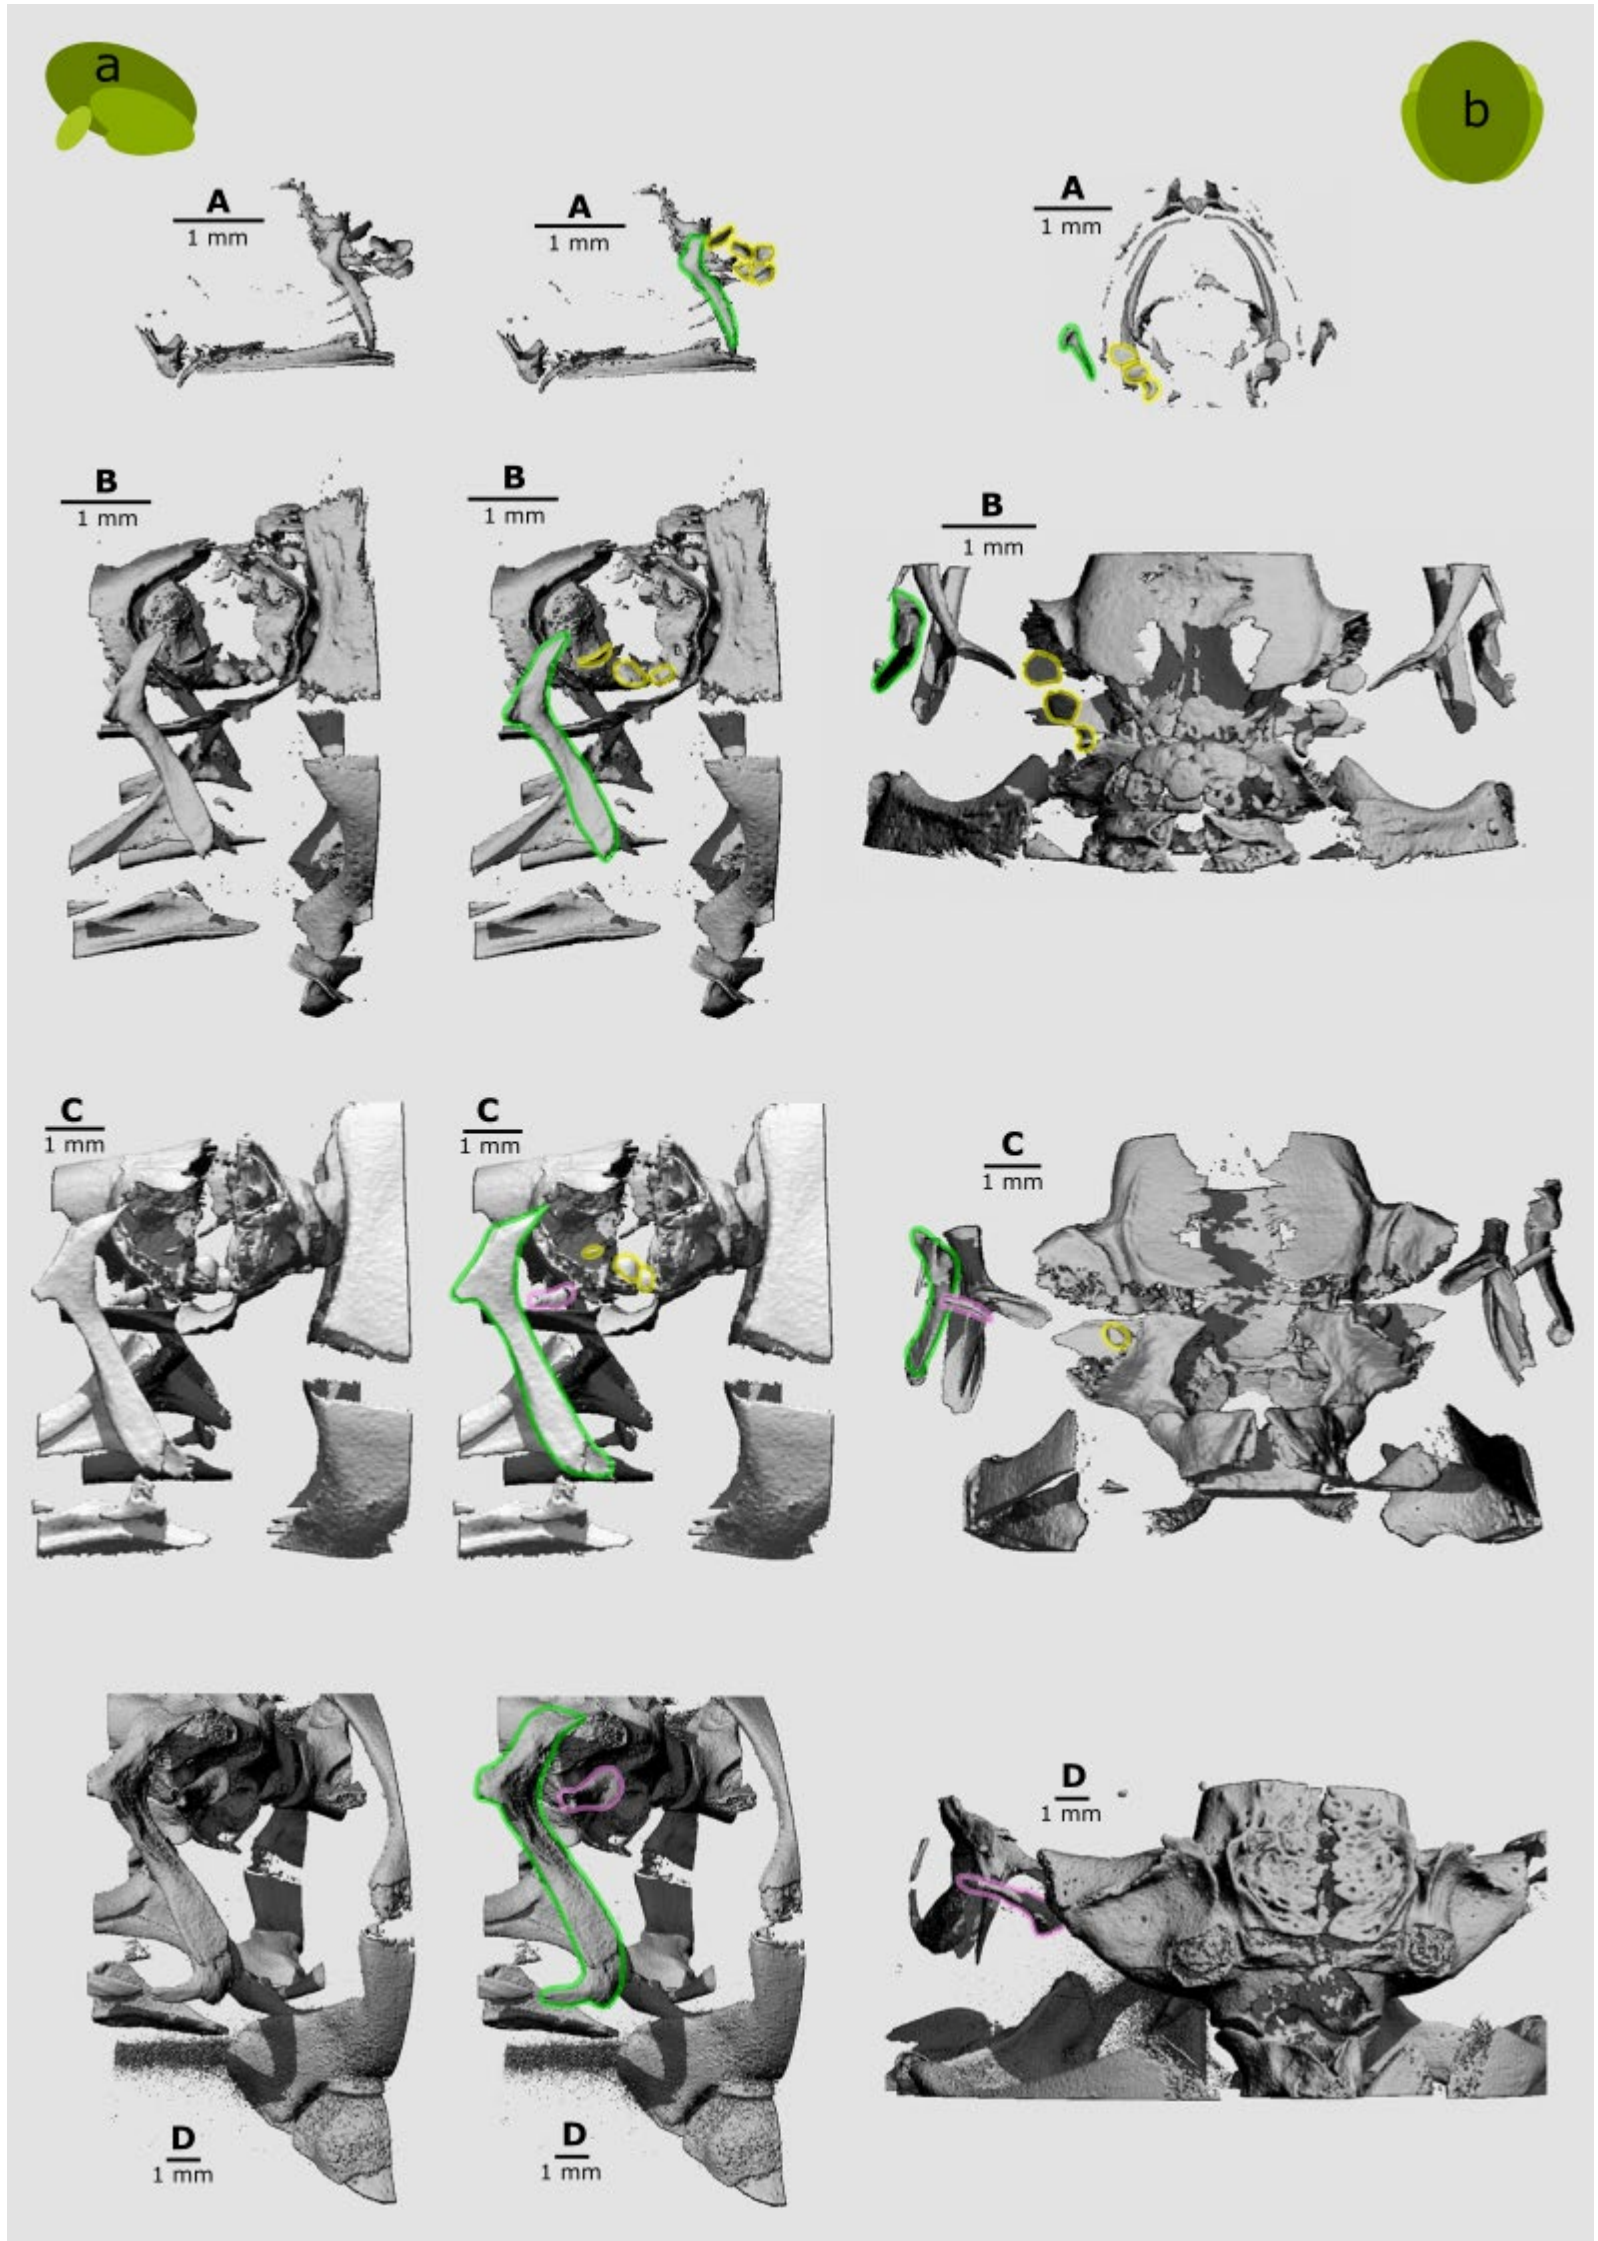

**Fig. S3.**  $\mu$ CT scans of natterjack toad cranial regions at four developmental stages. A: 11 mm, B: 23 mm, C: 29 mm, D: 68 mm. Otoliths are outlined in yellow, the squamosal is green, and the columella is pink. Note the differences in the ossification of the otic capsule. The scans on the left and in the middle are lateral view of the same left ear region (oriented as the diagrammatic toad a in the top left corner), without and with outlines respectively. Scans on the right are a dorsal view of the ear region (oriented as the diagrammatic toad b in the top right corner), comparisons with and without outlines can be made between the left and the righthand side of the scan.

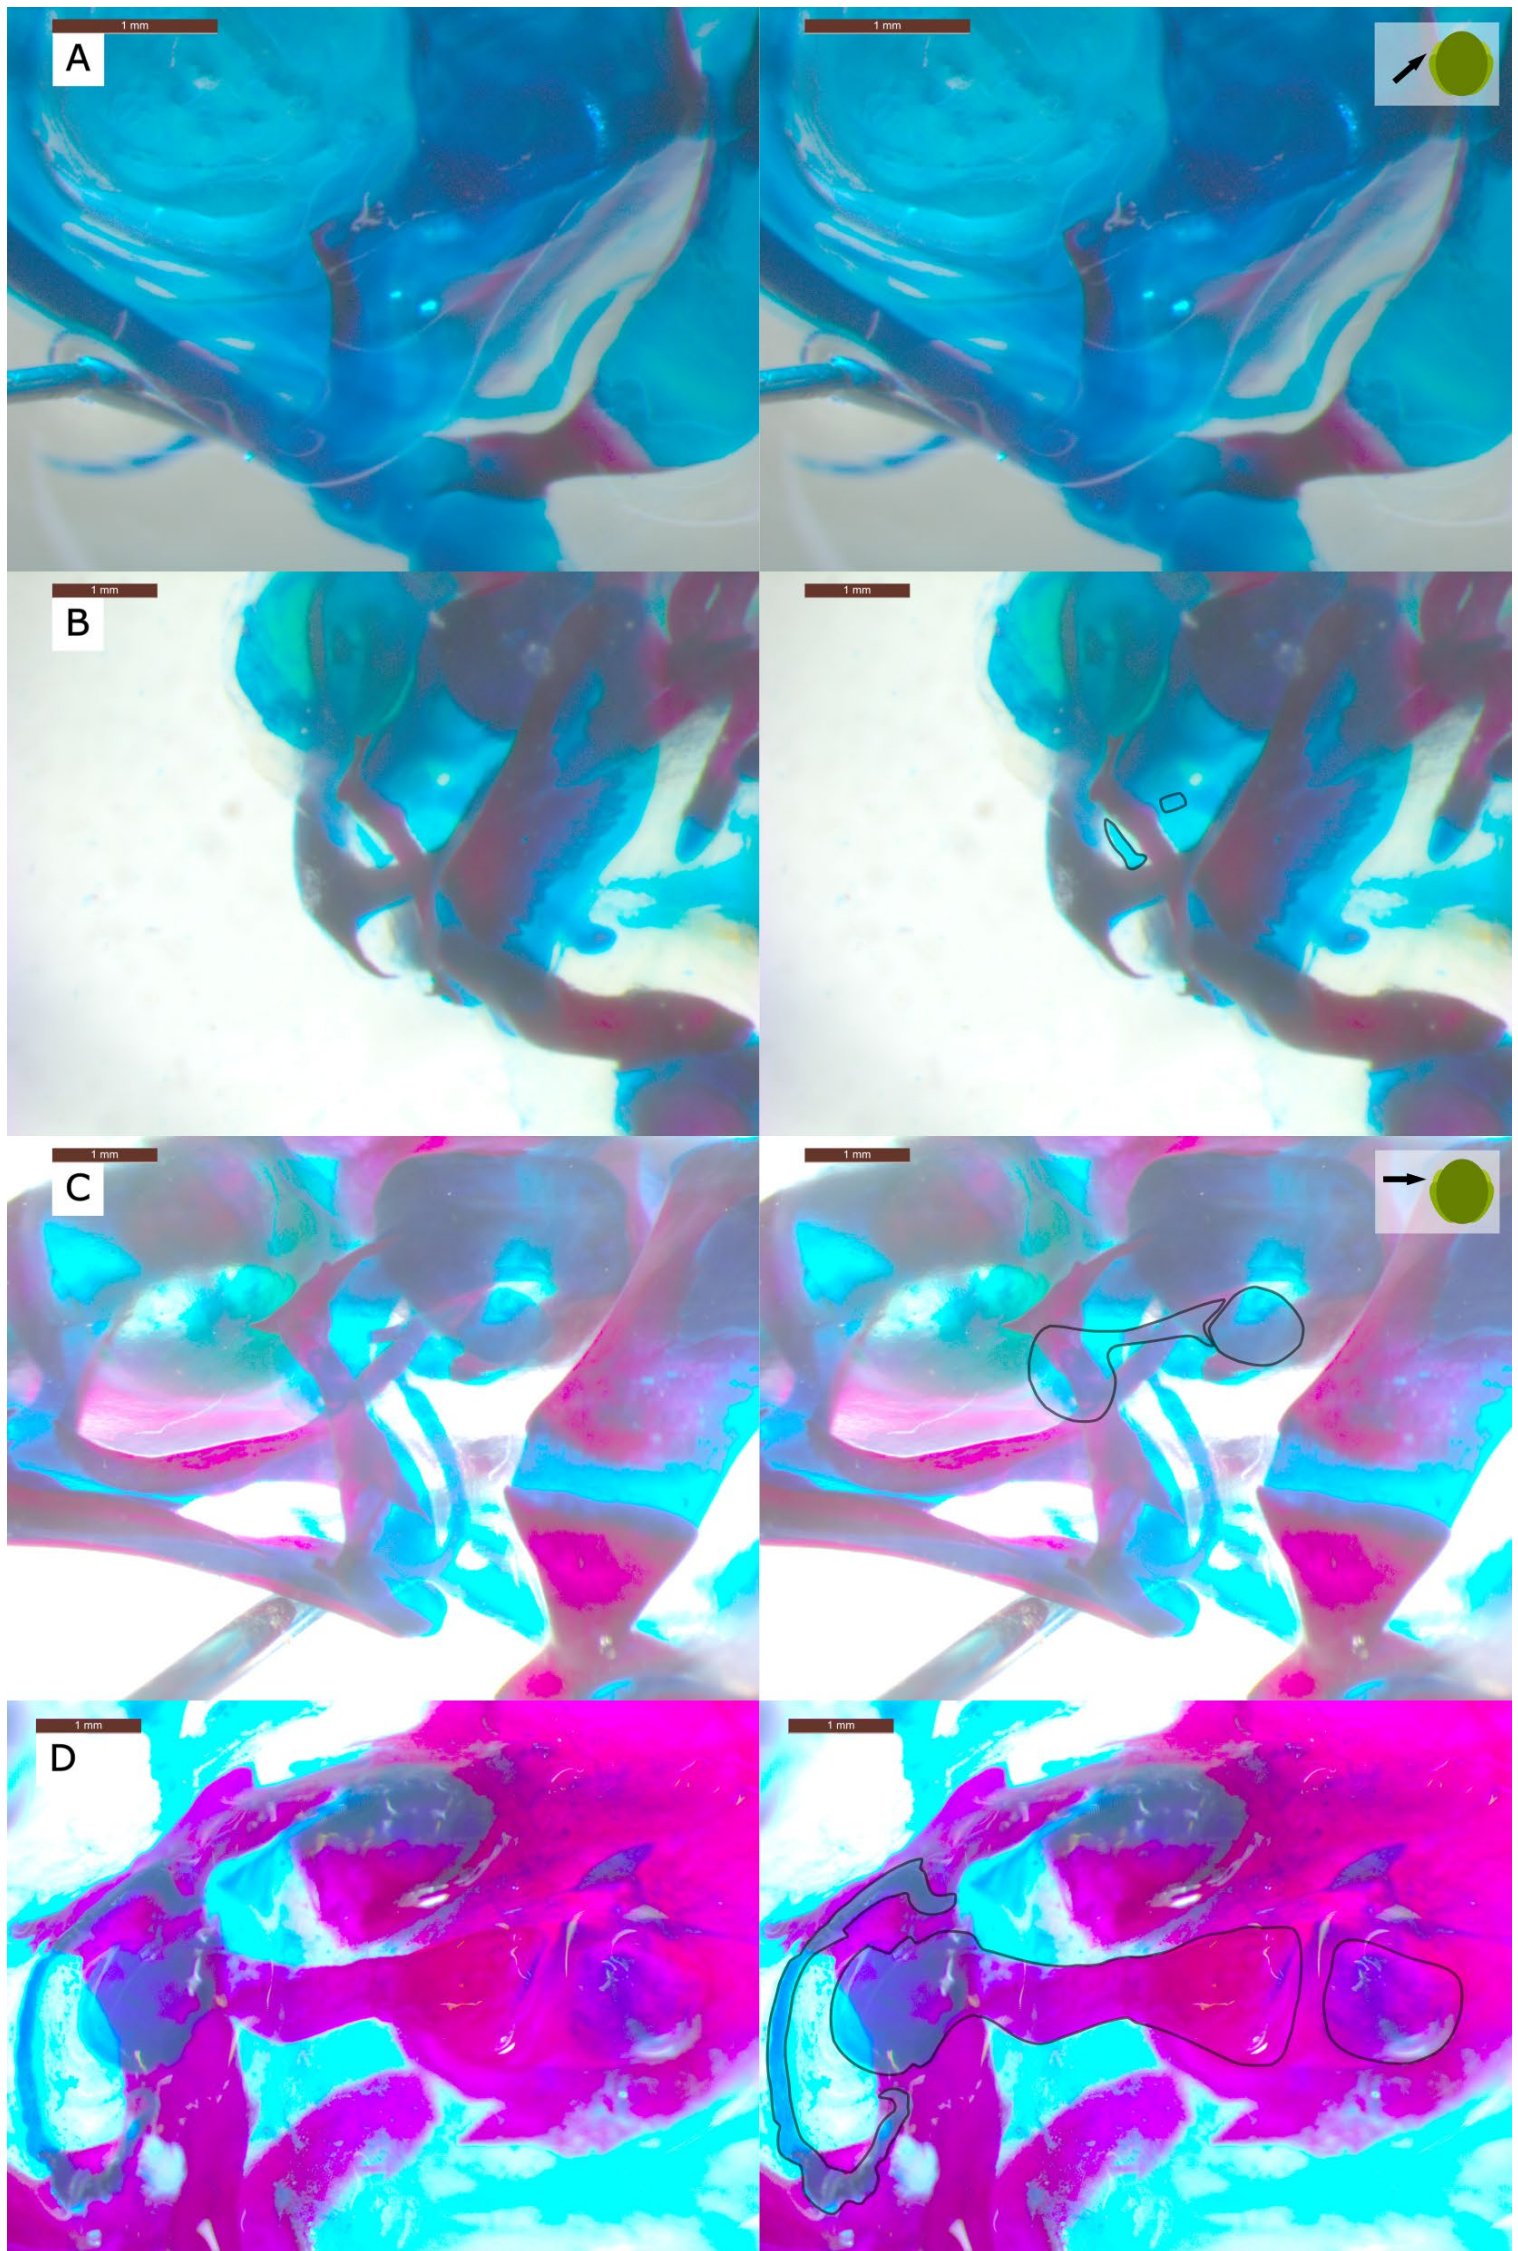

**Fig. S4.** Differential stained cranial regions of natterjack toads at four developmental stages: A: 15.5 mm, no trace of any middle ear structures. B: 25.5 mm, a small aggregation of blue cells (will probably form the extra-columella) and a tiny columella shaft. C: 29 mm, thin extra-columella, connected to the shaft and the footplate. Operculum is also outlined. D: 63 mm, fully developed middle ear, from left: tympanic annulus, extra-columella, columella shaft and columella footplate. Operculum is also outlined. Each picture is displayed twice, on the right outlines are added around the middle ear structures. Pictures were taken from a lateral view, in A and B with an angle pointing forward (see small diagram top right), in C and D perpendicular to the head (see small diagram), to enable best lighting conditions to capture the structures.
